# Supplementary material for: Metformin blocks MYC protein synthesis in colorectal cancer via mTOR‐4EBP‐eIF4E and MNK1‐eIF4G‐eIF4E signaling
Source: PubMed Central journal article supplement (PMC6210051; doi:10.1002/1878-0261.12384), 2018-10-15
Supplement: MOL2-12-1856-s001.pdf [file MOL2-12-1856-s001.pdf]

**Supporting information for the manuscript “Metformin blocks MYC protein synthesis in colorectal cancer via mTOR-4EBP-eIF4E and MNK-1- eIF4G-eIF4E signaling”**

Additional Supporting Information may be found online in the supporting information tab for this article as followings:

**Figure S1.** Metformin inhibit the growth of HCT116 p53<sup>-/-</sup> and DLD1 cells.

**Figure S2.** Metformin arrest cells at G1 phase without increasing subG1 population of HCT116 and HT29 cells.

**Figure S3.** Metformin inhibits colony formation of HCT116 p53<sup>-/-</sup> and DLD1 cells in a dose-dependent manner.

**Figure S4.** Metformin reduces both the RNA and protein levels of MYC in RKO cells.

**Figure S5.** Metformin activates AMPK as reflected by increased p-ACC expression.

**Figure S6.** (A) Protein synthesis kit flow chart. (B) Puromycin pull-down assay flow chart.

**Figure S7.** Metformin blocks protein synthesis in HT29 cells by OPP-based protein synthesis assay.

**Figure S8.** Metformin blocks protein synthesis in HT29 cells by ribopuromylation assay.

**Figure S9.** Metformin does not reduce the RNA expression level of RPPA candidate genes as shown by qRT-PCR, at the condition that reduces their protein expression in HCT116 and HT29 cells.

**Table S1.** List of reagents.

**Table S2.** List of primers.

**Table S3.** RPPA analysis identified 16 proteins that are down-regulated by metformin in all four cell lines, including the already demonstrated MYC protein.

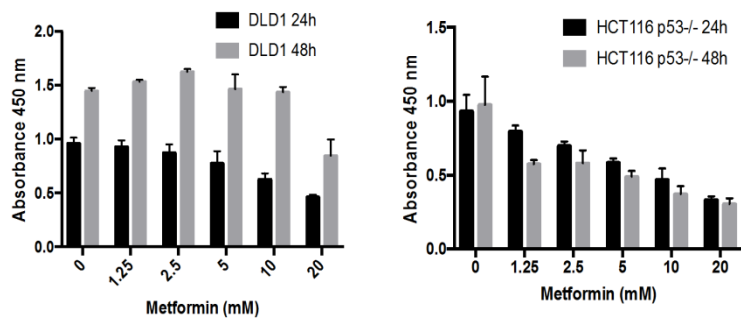

**Figure S1.** Metformin inhibit the growth of HCT116 p53-/- and DLD1 cells.

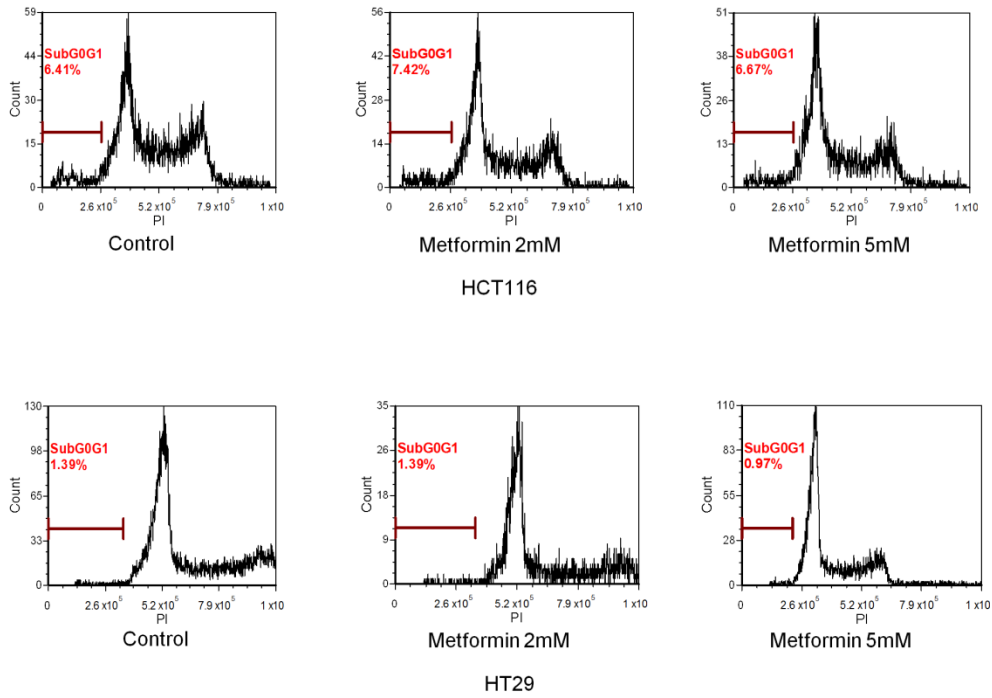

**Figure S2.** Metformin arrest cells at G1 phase without increasing subG1 population of HCT116 and HT29 cells.

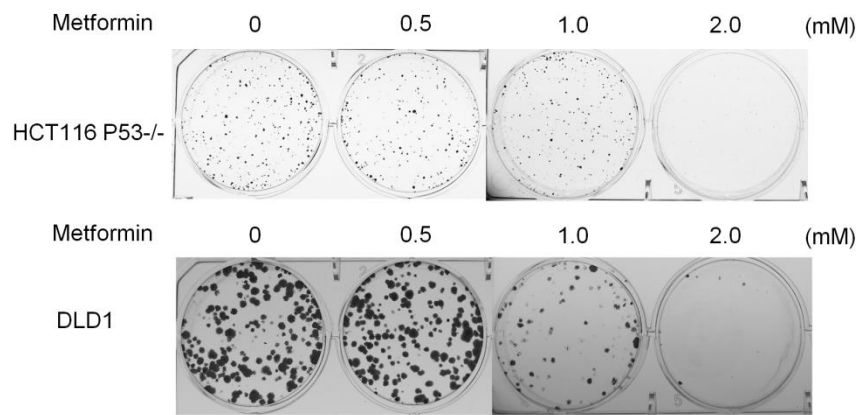

**Figure S3.** Metformin inhibits colony formation of HCT116 p53<sup>-/-</sup> and DLD1 cells in a dose-dependent manner.

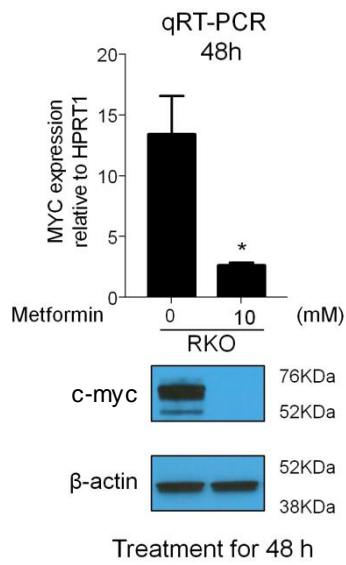

**Figure S4.** Metformin reduces both the RNA and protein levels of MYC in RKO cells. The qRT-PCR data are presented as the means  $\pm$  S.D. (n = 4). Student's t-test was used to assess significance. \*,  $p < 0.05$ .

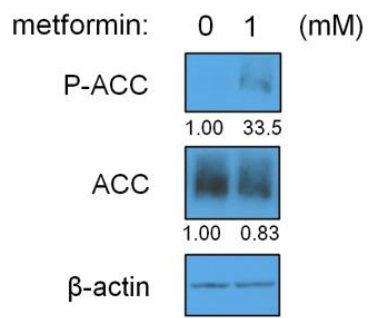

**Figure S5.** Metformin activates AMPK as reflected by increased p-ACC expression.

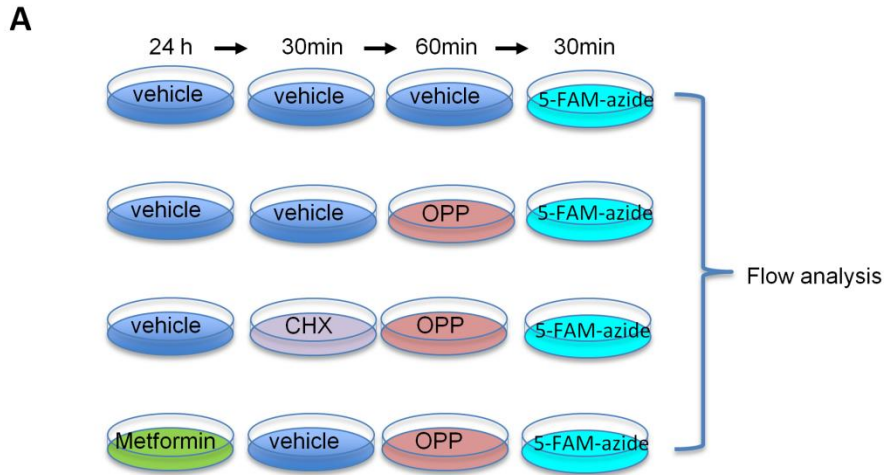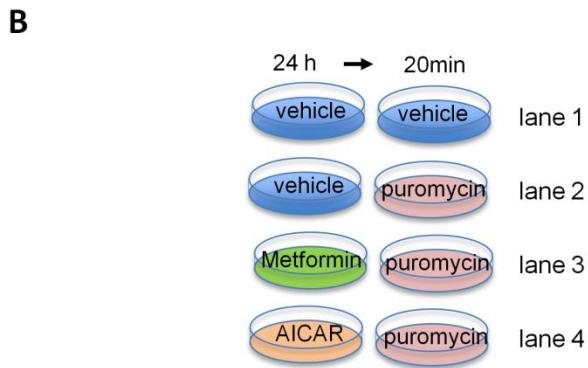

**Figure S6.** (A) Protein synthesis kit flow chart. (B) Puromycin pull-down assay flow chart.

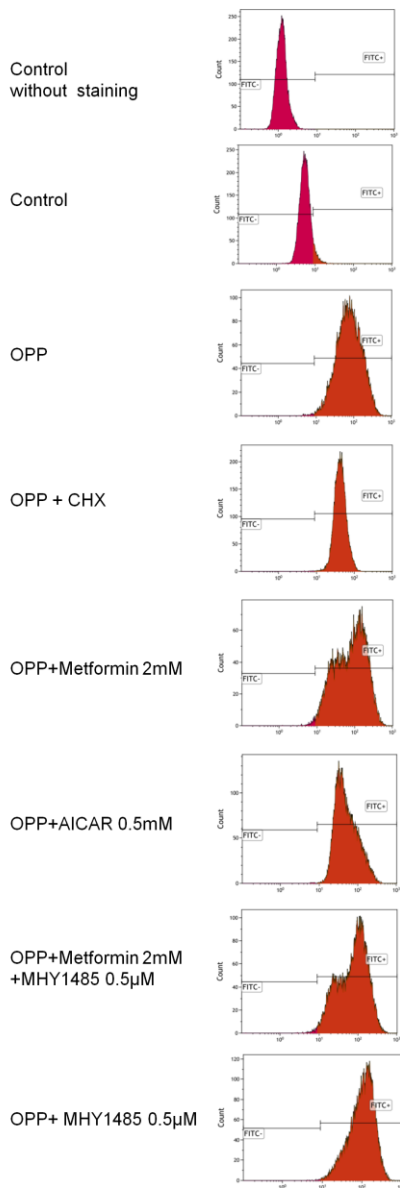

**Figure S7.** Metformin blocks protein synthesis in HT29 cells by OPP-based protein synthesis assay.

HT29 cells were treated with Metformin (2 mM), AICAR (0.5 mM), MHY1485 (1 µM), or Metformin (2mM) + MHY1485 (1 µM), in glucose-free medium for 24 h, and then the cells were collected for OPP assay according to the manufacturer's instructions using Protein Synthesis Assay Kit.



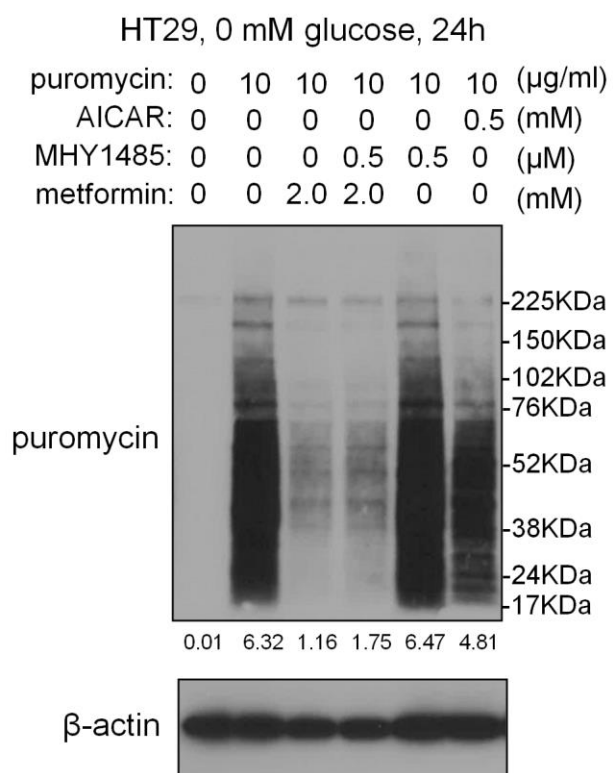

**Figure S8.** Metformin blocks protein synthesis in HT29 cells by ribopuromycylation assay. AICAR induces a similar yet weaker inhibitory effect. HT29 cells were treated as described in glucose-free medium for 24 h, and then the cells were incubated with puromycin (10  $\mu\text{g/ml}$ ) for 20 min. Total proteins were isolated, and detected by western blot using puromycin antibody.

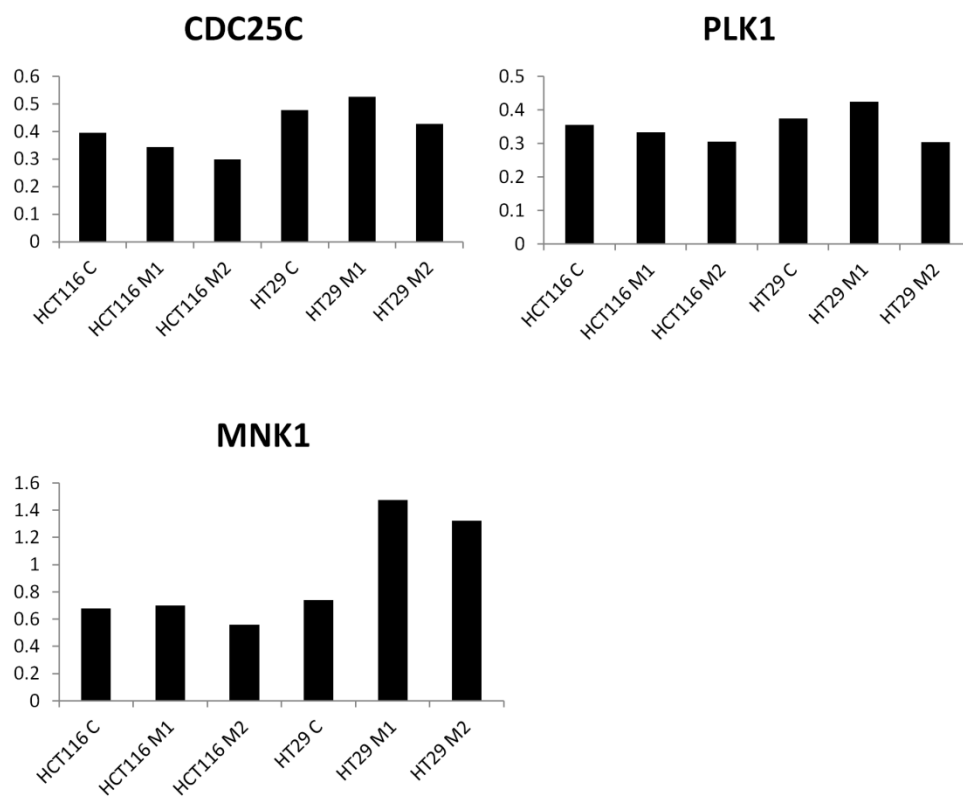

**Figure S9.** Metformin does not reduce the RNA expression level of RPPA candidate genes as shown by qRT-PCR, at the concentration that reduces their protein expression in HCT116 and HT29 cells.

**Table S1.** List of reagents used in this study.

| <b>Chemicals</b>            | <b>Catalog No.</b> | <b>Manufacturer</b>                          |
|-----------------------------|--------------------|----------------------------------------------|
| Metformin hydrochloride     | AB120847           | Abcam (Cambridge, MA, USA)                   |
| Cycloheximide               | 01810              | Sigma-Aldrich (St. Louis, MO, USA)           |
| AICAR                       | A9978              | Sigma-Aldrich (St. Louis, MO, USA)           |
| Dorsomorphin                | P5499              | Sigma-Aldrich (St. Louis, MO, USA)           |
| Polybrene                   | H9268              | Sigma-Aldrich (St. Louis, MO, USA)           |
| Geneticin                   | A1720              | Sigma-Aldrich (St. Louis, MO, USA)           |
| MG-132                      | 474787             | EMD Millipore (Billerica, MA, USA)           |
| MHY1485                     | 500554             | EMD Millipore (Billerica, MA, USA)           |
| Rapamycin                   | 553210             | EMD Millipore (Billerica, MA, USA)           |
| <b>Primary Antibodies</b>   | <b>Catalog No.</b> | <b>Manufacturer</b>                          |
| $\beta$ -actin              | A1978              | Sigma-Aldrich (St. Louis, MO, USA)           |
| c-Myc                       | #5741              | EMD Millipore (Billerica, MA, USA)           |
| Phospho-c-Myc (T58)         | AB185655           | Abcam (Cambridge, MA, USA)                   |
| AMPK $\alpha$ 1             | #3195              | Cell Signaling Technology (Beverly, MA, USA) |
| AMPK $\alpha$ 2             | #9562              | Cell Signaling Technology (Beverly, MA, USA) |
| Phospho-eIF4E(Ser209)       | #9741              | Cell Signaling Technology (Beverly, MA, USA) |
| Phospho-4E-BP1 (Thr37/46)   | #2855              | Cell Signaling Technology (Beverly, MA, USA) |
| PLK1                        | #4513              | Cell Signaling Technology (Beverly, MA, USA) |
| Phospho-MNK1                | #2111              | Cell Signaling Technology (Beverly, MA, USA) |
| Phospho-CDC25C              | #4688              | Cell Signaling Technology (Beverly, MA, USA) |
| Puromycin                   | EQ0001             | Kerafast (Boston, MA, USA)                   |
| <b>Secondary Antibodies</b> | <b>Catalog No.</b> | <b>Manufacturer</b>                          |
| Anti-Rabbit IgG             | A6154              | Sigma-Aldrich (St. Louis, MO, USA)           |
| Anti-Mouse IgG              | A4416              | Sigma-Aldrich (St. Louis, MO, USA)           |

**Table S2.** List of primers used in this study.

| <b>PCR primer</b> | <b>Primer Sequence</b>   |
|-------------------|--------------------------|
| MYC Forward       | CAGCTGCTTAGACGCTGGATT    |
| MYC Reverse       | GTAGAAATACGGCTGCACCGA    |
| PLK1 Forward      | CACCAGCACGTCGTAGGATTC    |
| PLK1 Reverse      | CCGTAGGTAGTATCGGGCCTC    |
| MKNK1 Forward     | GCTGACCTCTGAATTGCTTGG    |
| MKNK1 Reverse     | TCGATGATTTTGACGGCATACTC  |
| CDC25C Forward    | TCTACGGA ACTCTTCTCATCCAC |
| CDC25C Reverse    | TCCAGGAGCAGGTTTAACATTTT  |

**Table S3.** RPPA analysis identified 16 proteins that are down-regulated by metformin in all four cell lines, including the already demonstrated MYC protein.

| Gene name | DLD1 | HCT116 | HCT116 p53 <sup>-/-</sup> | HT29 |
|-----------|------|--------|---------------------------|------|
| PLK1      | 0.45 | 0.71   | 0.51                      | 0.41 |
| EEF2K     | 0.39 | 0.75   | 0.54                      | 0.48 |
| RB1       | 0.26 | 0.57   | 0.41                      | 0.49 |
| FOXM1     | 0.50 | 0.86   | 0.57                      | 0.49 |
| CDC25C    | 0.75 | 0.76   | 0.60                      | 0.52 |
| CHEK1     | 0.75 | 0.74   | 0.79                      | 0.64 |
| CDK1      | 0.68 | 0.61   | 0.74                      | 0.65 |
| MYT1      | 0.77 | 0.87   | 0.83                      | 0.68 |
| MYC       | 0.73 | 0.91   | 0.56                      | 0.68 |
| MKNK1     | 0.67 | 0.58   | 0.58                      | 0.72 |
| SRC       | 0.72 | 0.77   | 0.49                      | 0.72 |
| BRD4      | 0.64 | 0.88   | 0.72                      | 0.73 |
| CHEK2     | 0.81 | 0.88   | 0.79                      | 0.84 |
| XPA       | 0.84 | 0.81   | 0.74                      | 0.85 |
| STAT3     | 0.51 | 0.79   | 0.71                      | 0.87 |
| RPS6KB1   | 0.57 | 0.80   | 0.64                      | 0.91 |
